# Supplementary material for: Lung Magnetic Resonance Imaging with Diffusion Weighted Imaging Provides Regional Structural as well as Functional Information Without Radiation Exposure in Primary Antibody Deficiencies
Source: Springer Nature journal article supplement (doi:10.1007/s10875-015-0172-2), 2015-06-11
Supplement: MOESM1 [file 8908610]

**Supplementary Table 1 – Diagnosis, clinical features and FEV1 of 18 patients enrolled in the study**

| PATIENT NUMBER | DIAGNOSIS | GENDER | AGE (YEARS) | DISEASE TIME (YEARS) | TROUGH LEVELS | IVIG/SCIG REPLACEMENT | SPLENOMEGALY | SYSTEMIC GRANULOMATOUS DISEASE | AUTOIMMUNITY                                      | LINFO-ADENOPATY | FEV1% | COPD |
|----------------|-----------|--------|-------------|----------------------|---------------|-----------------------|--------------|--------------------------------|---------------------------------------------------|-----------------|-------|------|
| 1              | CVID      | M      | 36          | 4                    | 645           | IVIG                  | YES          | YES                            | IMMUNE THROMBOCYTOPENIC PURPURA; PSORIASIS        | YES             | 76    | No   |
| 2              | CVID      | M      | 43          | 13                   | 958           | IVIG                  | YES          | NO                             | NO                                                | YES             | 61    | YES  |
| 3              | CVID      | F      | 39          | 6                    | 601           | IVIG                  | YES          | YES                            | HAEMOLYTIC ANEMIA, DIABETES MELLITUS              | YES             | 92    | No   |
| 4              | CVID      | M      | 18          | 1                    | 650           | IVIG                  | NO           | YES                            | LYMPHOCYTIC INTERSTITIAL PNEUMONIA                | YES             | 82    | No   |
| 5              | CVID      | M      | 40          | 22                   | 613           | IVIG                  | YES          | NO                             | NO                                                | NO              | 86    | No   |
| 6              | CVID      | M      | 47          | 25                   | 668           | IVIG                  | YES          | YES                            | HAEMOLITIC ANEMIA                                 | YES             | 45    | NO   |
| 7              | CVID      | M      | 48          | 2                    | 550           | IVIG                  | YES          | NO                             | NO                                                | YES             | 49    | YES  |
| 8              | CVID      | M      | 30          | 10                   | 509           | SCIG                  | YES          | NO                             | IMMUNE THROMBOCYTOPENIC PURPURA                   | NO              | 39    | No   |
| 9              | CVID      | F      | 24          | 2                    | 528           | SCIG                  | NO           | NO                             | CELIAC DISEASE                                    | NO              | 83    | No   |
| 10             | CVID      | M      | 55          | 44                   | 704           | IVIG                  | NO           | NO                             | NO                                                | NO              | 84    | No   |
| 11             | CVID      | M      | 27          | 2                    | 850           | IVIG                  | YES          | NO                             | NO                                                | NO              | 85    | No   |
| 12             | CVID      | F      | 64          | 56                   | 603           | IVIG                  | YES          | NO                             | NO                                                | YES             | 26    | YES  |
| 13             | XLA       | M      | 35          | 33                   | 950           | IVIG                  | YES          | NO                             | NO                                                | NO              | 36    | YES  |
| 14             | XLA       | M      | 24          | 12                   | 551           | IVIG                  | NO           | NO                             | CELIAC DISEASE, ULCERATIVE RETTOCOLITIS, ALOPECIA | YES             | 45    | YES  |
| 15             | CVID      | F      | 64          | 15                   | 757           | IVIG                  | NO           | NO                             | ARTHRITIS                                         | NO              | 115   | No   |
| 16             | CVID      | M      | 32          | 3                    | 500           | IVIG                  | NO           | NO                             | NO                                                | YES             | 32    | YES  |
| 17             | CVID      | M      | 70          | 8                    | 836           | IVIG                  | NO           | NO                             | NO                                                | NO              | 100   | No   |
| 18             | CVID      | F      | 73          | 8                    | 725           | IVIG                  | YES          | NO                             | NO                                                | YES             | 54    | YES  |
