# Supplementary material for: Lung Magnetic Resonance Imaging with Diffusion Weighted Imaging Provides Regional Structural as well as Functional Information Without Radiation Exposure in Primary Antibody Deficiencies
Source: Springer Nature journal article supplement (doi:10.1007/s10875-015-0172-2), 2015-06-11
Supplement: MOESM2 [file 8908610]

**Supplementary Table 2. – Comparison of individual scores by MRI and HRCT**

Individual bronchial and parenchymal abnormalities by MRI and HRCT according to a modified Bhalla score in 18 PAD patients.

| PATIENT NUMBER | GENERALITIES OF THE BRONCHIAL DIVISION |     | BRONCHIECTASIS SEVERITY |     | BRONCHIECTASIS EXTENSION |     | BRONCHIAL WALL THICKENING |     | MUCUS PLUGGING |     | ABSCESSSES |     | BULLAE |     | EMPHYSEMA |     | NODULE NUMBER |     | NODULE DIMENSION |     | CONSOLIDATION |     |
|----------------|----------------------------------------|-----|-------------------------|-----|--------------------------|-----|---------------------------|-----|----------------|-----|------------|-----|--------|-----|-----------|-----|---------------|-----|------------------|-----|---------------|-----|
|                | CT                                     | MRI | CT                      | MRI | CT                       | MRI | CT                        | MRI | CT             | MRI | CT         | MRI | CT     | MRI | CT        | MRI | CT            | MRI | CT               | MRI | CT            | MRI |
| 1              | 3                                      | 2   | 1                       | 1   | 2                        | 2   | 1                         | 1   | 1              | 1   | 0          | 0   | 0      | 0   | 0         | 0   | 2             | 2   | 2                | 2   | 1             | 1   |
| 2              | 3                                      | 3   | 2                       | 2   | 2                        | 2   | 2                         | 1   | 1              | 1   | 1          | 0   | 0      | 0   | 0         | 0   | 0             | 0   | 0                | 0   | 0             | 0   |
| 3              | 2                                      | 1   | 1                       | 1   | 1                        | 1   | 1                         | 1   | 0              | 0   | 0          | 0   | 0      | 0   | 0         | 0   | 2             | 2   | 2                | 2   | 2             | 2   |
| 4              | 3                                      | 3   | 1                       | 1   | 1                        | 1   | 1                         | 0   | 1              | 1   | 0          | 0   | 0      | 0   | 0         | 0   | 2             | 2   | 2                | 2   | 2             | 2   |
| 5              | 3                                      | 3   | 2                       | 2   | 1                        | 1   | 1                         | 1   | 1              | 1   | 0          | 0   | 0      | 0   | 0         | 0   | 0             | 0   | 0                | 0   | 1             | 1   |
| 6              | 2                                      | 2   | 2                       | 2   | 3                        | 3   | 2                         | 2   | 0              | 0   | 0          | 0   | 0      | 0   | 1         | 1   | 1             | 1   | 2                | 2   | 2             | 2   |
| 7              | 3                                      | 3   | 1                       | 1   | 1                        | 1   | 1                         | 1   | 1              | 1   | 0          | 0   | 0      | 0   | 0         | 0   | 0             | 0   | 0                | 0   | 0             | 0   |
| 8              | 3                                      | 2   | 1                       | 1   | 1                        | 1   | 1                         | 1   | 1              | 1   | 0          | 0   | 0      | 0   | 0         | 0   | 0             | 0   | 0                | 0   | 0             | 0   |
| 9              | 3                                      | 1   | 1                       | 1   | 1                        | 1   | 0                         | 0   | 0              | 0   | 0          | 0   | 0      | 0   | 0         | 0   | 1             | 1   | 1                | 1   | 0             | 0   |
| 10             | 2                                      | 2   | 1                       | 1   | 1                        | 1   | 1                         | 1   | 0              | 0   | 0          | 0   | 0      | 0   | 0         | 0   | 0             | 0   | 0                | 0   | 0             | 0   |
| 11             | 1                                      | 0   | 0                       | 0   | 0                        | 0   | 0                         | 0   | 0              | 0   | 0          | 0   | 0      | 0   | 0         | 0   | 0             | 0   | 0                | 0   | 0             | 0   |
| 12             | 3                                      | 3   | 2                       | 2   | 3                        | 3   | 2                         | 2   | 1              | 1   | 0          | 0   | 0      | 0   | 2         | 2   | 1             | 1   | 1                | 1   | 2             | 2   |
| 13             | 3                                      | 3   | 3                       | 3   | 2                        | 2   | 3                         | 3   | 1              | 1   | 0          | 0   | 0      | 0   | 2         | 2   | 1             | 1   | 1                | 1   | 2             | 2   |
| 14             | 3                                      | 3   | 2                       | 2   | 2                        | 2   | 2                         | 2   | 2              | 2   | 0          | 0   | 0      | 0   | 0         | 0   | 1             | 0   | 1                | 0   | 0             | 0   |
| 15             | 0                                      | 0   | 0                       | 0   | 0                        | 0   | 0                         | 0   | 0              | 0   | 0          | 0   | 0      | 0   | 0         | 0   | 1             | 1   | 1                | 1   | 0             | 0   |
| 16             | 2                                      | 1   | 1                       | 1   | 1                        | 1   | 1                         | 1   | 1              | 1   | 0          | 0   | 0      | 0   | 0         | 0   | 1             | 0   | 1                | 0   | 2             | 2   |
| 17             | 0                                      | 0   | 0                       | 0   | 0                        | 0   | 0                         | 0   | 0              | 0   | 0          | 0   | 0      | 0   | 0         | 0   | 1             | 1   | 1                | 1   | 0             | 0   |
| 18             | 3                                      | 0   | 1                       | 0   | 1                        | 0   | 1                         | 0   | 0              | 0   | 0          | 0   | 0      | 0   | 0         | 1   | 1             | 2   | 2                | 1   | 1             |     |
